# Supplementary material for: Involving patients and clinicians in a pilot randomised clinical trial of spinal manual therapy versus nerve root injection for lumbar radiculopathy: protocol of a patient and public involvement project
Source: HighWire-hosted journal article supplement (doi:10.1136/bmjopen-2021-057881), 2022-04-01
Supplement: bmjopen-2021-057881supp001_data_supplement.pdf [file bmjopen-2021-057881supp001_data_supplement.pdf]

## Appendix A – Kickoff Meeting

**Aim:** The kickoff meeting is designed for building the required capacity for the PPI project by offering information on how clinical research and PPI projects work and familiarizing advisors with the upcoming PPI tasks. The meeting will not only facilitate establishing rapport, but also prepare and empower patient and clinician advisors to be capable for high quality involvement on the PPI project.

### Schedule:

| Speaker                                                     | Timeline                                                                         | Patient and clinician advisors together                                                                          |                                                                                 |
|-------------------------------------------------------------|----------------------------------------------------------------------------------|------------------------------------------------------------------------------------------------------------------|---------------------------------------------------------------------------------|
| CAH, CR, LC, LH                                             | 5min                                                                             | Welcome, introduction of project team member                                                                     |                                                                                 |
| LH                                                          | 5min                                                                             | Clinical trial research in a nutshell, explained based on the SALuBRITY trial                                    |                                                                                 |
| LC                                                          | 5min                                                                             | PPI introduction: Reasons why, consultation vs. collaboration approaches, expectations, aim for this PPI project |                                                                                 |
| CR                                                          | 10min                                                                            | Introduction advisors, ice breaker                                                                               |                                                                                 |
| CR                                                          | 10min                                                                            | Expectations, shared purpose, next steps                                                                         |                                                                                 |
|                                                             | = 35min                                                                          |                                                                                                                  |                                                                                 |
| 10min break and split up in groups                          |                                                                                  |                                                                                                                  |                                                                                 |
| Timeline                                                    | Patient advisors                                                                 | Timeline                                                                                                         | Clinician advisors                                                              |
| 20min                                                       | Exchange of lived experience with lumbar radiculopathy                           | 15min                                                                                                            | Presentation of trial methods, i.e., outcomes, design, interventions/procedures |
| 15min                                                       | Presentation of trial methods, i.e., outcomes, design, interventions /procedures | 10min                                                                                                            | Time for questions                                                              |
| 10min                                                       | Time for questions                                                               |                                                                                                                  |                                                                                 |
| =55min                                                      |                                                                                  | =35min                                                                                                           |                                                                                 |
| <b>Total duration:</b><br>35 + 45 + 10min break = 1h 30 min |                                                                                  | <b>Total duration:</b><br>35 + 35 + 10min break = 1h 20 min                                                      |                                                                                 |
