# Supplementary material for: Involving patients and clinicians in a pilot randomised clinical trial of spinal manual therapy versus nerve root injection for lumbar radiculopathy: protocol of a patient and public involvement project
Source: HighWire-hosted journal article supplement (doi:10.1136/bmjopen-2021-057881), 2022-04-01
Supplement: bmjopen-2021-057881supp004_data_supplement.pdf [file bmjopen-2021-057881supp004_data_supplement.pdf]

## Appendix D – Impact log

### Patients

| Vignettes                                                                                               | Advisor | Discussion | Impact |
|---------------------------------------------------------------------------------------------------------|---------|------------|--------|
| <b>Research question</b><br>Key words: importance, relevance                                            |         |            |        |
| <b>Proposed methods</b><br>- <b>Study design</b><br>Key words: double sham, random allocation, blinding |         |            |        |
| <b>Proposed methods</b><br>- <b>Recruitment process and timings</b><br>Key words: time intervals        |         |            |        |
| <b>Proposed methods</b><br>- <b>Pain medication</b><br>Key words: 0-24h                                 |         |            |        |
| <b>Trial outcomes</b><br>- <b>Primary outcome</b><br>Key words: pain impact, pain location, intensity   |         |            |        |
| <b>Trial outcomes</b><br>- <b>Clinical course by SMS</b>                                                |         |            |        |

### Clinicians

| Vignettes                                                                                                                                        | Advisor | Discussion | Impact |
|--------------------------------------------------------------------------------------------------------------------------------------------------|---------|------------|--------|
| <b>Research question</b><br>Key words: importance, relevance, clinical practice, gaps in evidence help guiding treatment                         |         |            |        |
| <b>Proposed methods</b><br>- <b>Recruitment process</b><br>Key words: clinician information form, recruitment process, timing, referring process |         |            |        |

|                                                                                                               |  |  |  |
|---------------------------------------------------------------------------------------------------------------|--|--|--|
| <b>Proposed methods</b><br>- <b>Pain medication</b><br>Key words: 0-24h                                       |  |  |  |
| <b>Trial outcomes</b><br>- <b>Primary outcome</b><br>Key words: pain<br>impact, pain location,<br>intensity   |  |  |  |
| <b>Trial outcomes</b><br>- <b>Non-inferiority<br/>margin</b><br>Key words: 0.75<br>points on PEG<br>ignorable |  |  |  |
| <b>Referral Network</b><br>Key words: GP referral<br>network                                                  |  |  |  |
